# Supplementary material for: Rapid miRNA detection in skin interstitial fluid using a hydrogel microneedle patch integrated with DNA probes and graphene oxide
Source: Royal Society of Chemistry journal article supplement (doi:10.1039/d4lc00715h), 2024-01-01
Supplement: d4lc00715h1.pdf [file d4lc00715h1.pdf]

## Supporting Information

### A Potential Assay towards Rapid miRNA Detection from Skin Interstitial Fluid Using a Hydrogel Microneedle Patch Integrated with DNA Probe and Graphene Oxide

Hanjia Zheng,<sup>a</sup> Fatemeh Keyvani,<sup>a</sup> Sadegh Sadeghzadeh,<sup>a</sup> Dragos F. Mantaila,<sup>a</sup> Fasih A. Rahman,<sup>b</sup> Joe Quadrilatero,<sup>b</sup> Mahla Poudineh<sup>a\*</sup>

<sup>a</sup>Department of Electrical and Computer Engineering, Faculty of Engineering, University of Waterloo, Waterloo, ON N2L 3G1, Canada

<sup>b</sup>Department of Kinesiology and Health Sciences, University of Waterloo, Waterloo, ON N2L 3G1, Canada.

\* Email: mahla.poudineh@uwaterloo.ca

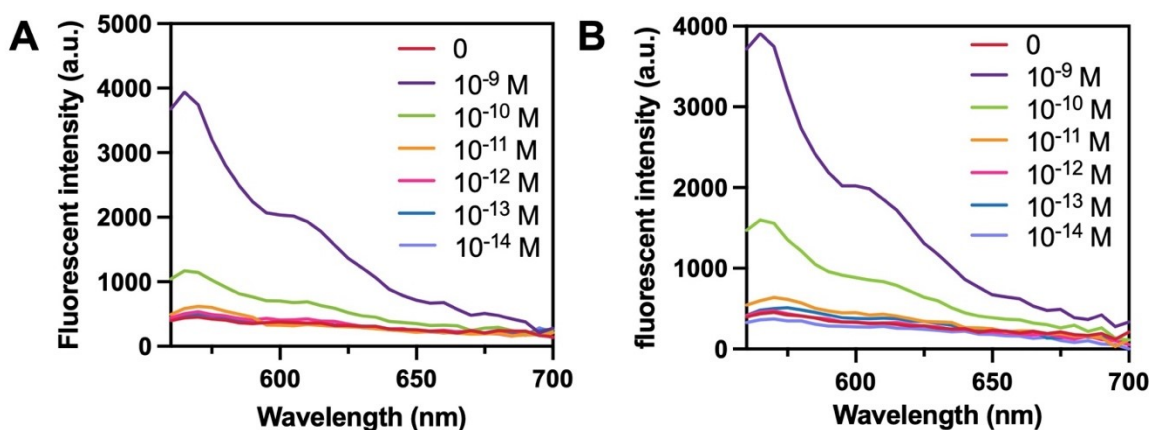

**Figure S1.** The Fluorescent spectra of (A) GO.pDNA210 and (B) GO.pDNA21 when tried with 10<sup>-9</sup>, 10<sup>-10</sup>, 10<sup>-11</sup>, 10<sup>-12</sup>, 10<sup>-13</sup>, 10<sup>-14</sup> and 0 M of miR-210 and of miR-21, respectively.

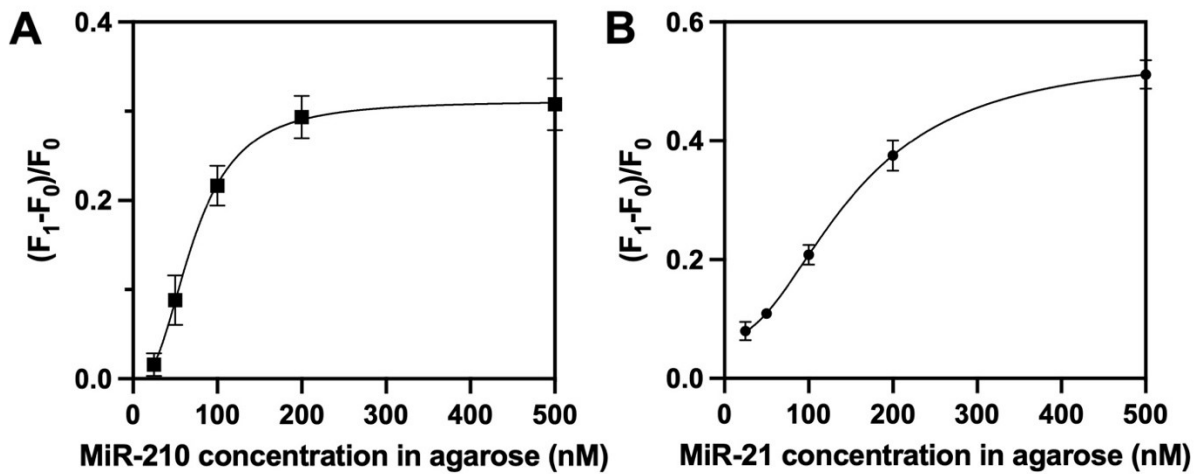

**Figure S2.** The calibration curve of (A)HMN-miR-210 sensor and (B)HMN-miR-21 sensor on agarose hydrogel.

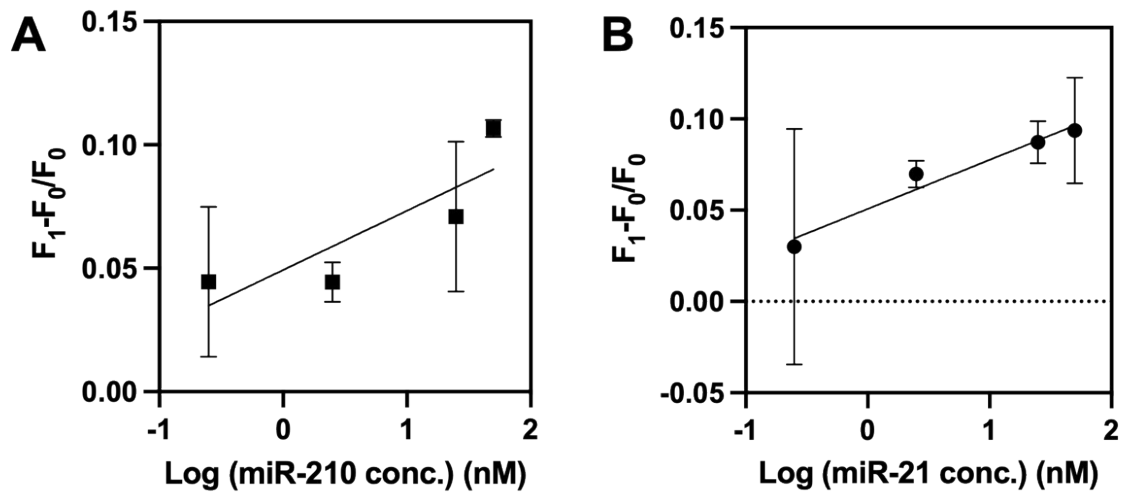

**Figure S3.** The zoom-in *ex vivo* calibration curves for (A) HMN-miR-210 and (B) HMN-miR-21 sensor with a concentration range from 0.25 nM to 50 nM.

**Table S1. Sequence and modification of probe DNA (pDNA) and miRNA targets**

| Name                              | Sequence (5' to 3')                        |
|-----------------------------------|--------------------------------------------|
| pDNA 210                          | Cy3-TCAGCCGCTGTCACACGCACAG-NH <sub>2</sub> |
| pDNA 21                           | Cy3-TCAACATCAGTCTGATAAGCTA-NH <sub>2</sub> |
| miR-210<br>(non-comp for pDNA 21) | CUGUGCGUGUGACAGCGGCUG <sup>1,2</sup>       |
| miR-21<br>(non-comp for pDNA 21)  | UAGCUUAUCAGACUGAUGUUGA <sup>1-3</sup>      |
| miR-210-mis                       | CUGUGCGUGUGACAGCGACUG                      |
| miR-21-mis                        | UAGCUUAUCAGACUGGUGUUGA                     |

**Table S2. Comparison of the recently reported HMN based miRNA sensor and HMN-miR sensor**

| Ref            | <i>In vitro</i> target detection range | LOD of <i>in vitro</i> study         | <i>Ex vivo</i> target detection range | LOD of <i>ex vivo</i> study          |
|----------------|----------------------------------------|--------------------------------------|---------------------------------------|--------------------------------------|
| 4              | 0.1 pM to 1 nM                         | 159.09 fM                            | 500 nM & 1 μM                         | n/a                                  |
| 5              | 10 pM to 25 nM                         | 48 pM                                | 500 nM to 500 pM                      | n/a                                  |
| 6              | n/a                                    | n/a                                  | 10–200 nM                             | 6 nM                                 |
| HMN-miR sensor | 10 fM to 1 nM                          | 2.28 pM (miR210) and 1.23 pM (miR21) | 0.25 nM to 500 nM                     | 2.49 nM (miR210) and 2.23 nM (miR21) |

**References**

- 1 Y. Tang, X. Zhou, J. Ji, L. Chen, J. Cao, J. Luo and S. Zhang, *International Journal of Biological Markers*, 2015, **30**, e347–e358.
- 2 C. Kalogirou, J. Ellinger, G. Kristiansen, G. Hatzichristodoulou, H. Kübler, B. Kneitz, J. Busch and A. Fendler, *Transl Androl Urol*, 2020, **9**, 1314–1322.
- 3 H. T. Nguyen, S. E. O. Kacimi, T. L. Nguyen, K. H. Suman, R. Lemus-Martin, H. Saleem and D. N. Do, *Biology (Basel)*, 2021, **10**, 417.
- 4 Q. Yang, Y. Wang, T. Liu, C. Wu, J. Li, J. Cheng, W. Wei, F. Yang, L. Zhou, Y. Zhang, S. Yang and H. Dong, *ACS Nano*, 2022, **16**, 18366–18375.
- 5 Y. Qiao, J. Du, R. Ge, H. Lu, C. Wu, J. Li, S. Yang, S. Zada, H. Dong and X. Zhang, *Anal Chem*, 2022, **94**, 5538–5545.
- 6 D. Al Sulaiman, J. Y. H. Chang, N. R. Bennett, H. Topouzi, C. A. Higgins, D. J. Irvine and S. Ladame, *ACS Nano*, 2019, **13**, 9620–9628.
